# Supplementary material for: Scrutinizing the causal link between excited delirium syndrome and restraint: a commentary on ‘The role of restraint in fatal excited delirium: a research synthesis and pooled analysis’ by E.M.F. Strömmer, W. Leith, M.P. Zeegers, and M.D. Freeman
Source: Springer Nature journal article supplement (doi:10.1007/s12024-023-00589-3), 2023-02-16
Supplement: MOESM1 [file 24035714]

**Review of the references used for data extraction by Strømmer *et al.*,**

\* For full references, see Strømmer *et al.*

\* For 'context' a difference was made between 'clinical' (relating to clinical medicine) and 'non-clinical' (relating to toxicology or medico-legal issues)

\* 'Strømmer N' and 'Strømmer Fatalities' indicate number of cases and fatalities according to Strømmer *et al.*; 'Reviewed N' and 'Reviewed Fatalities' indicate number of cases and fatalities according to our review

\* Red squares indicate differences between Strømmer *et al.* and our review.

| REFERENCES FOR THE CASE ANALYSIS |                              |      |                       |              | Strømmer | Strømmer   | Reviewed | Reviewed   |                                                                                                                                                               |
|----------------------------------|------------------------------|------|-----------------------|--------------|----------|------------|----------|------------|---------------------------------------------------------------------------------------------------------------------------------------------------------------|
| First author                     | Publishing journal           | Year | Term used             | Context      | N        | Fatalities | N        | Fatalities | Paper summary                                                                                                                                                 |
| Aberegg                          | J Lung Pulm Respir Res.      | 2014 | ExDS                  | Clinical     | 1        | N/a        | 1        | 0          | Clinical management of a non-fatal case of ExDS of unknown cause                                                                                              |
| Alciati                          | J Psychoactive Drugs.        | 1999 | Neither               | Clinical     | 3        | N/a        | 3        | 0          | Clinical case series of three non-fatal cases of delirium following MDMA overdose                                                                             |
| Atherton                         | J Forensic Sci.              | 2019 | ExDS                  | Non-clinical | 2        | N/a        | 1        | 0          | Toxicological case series of 4 deaths related to n-Ethyl Pentylol                                                                                             |
| Benzer                           | N Engl J Med.                | 2013 | AgDS                  | Clinical     | 1        | N/a        | 1        | 0          | Clinical case report of a non-fatal "bath salt" intoxication                                                                                                  |
| Blaho                            | J Clin Forensic Med.         | 2000 | ExDS                  | Non-clinical | 2        | N/a        | 2        | 1          | Toxicological Case series to discuss the half-life of cocaine in hyperthermic patient, using one fatal and one non-fatal case of cocaine-induced ExDS         |
| Bozeman                          | J Emerg Med.                 | 2013 | ExDS                  | Clinical     | 1        | N/a        | 1        | 0          | Clinical case report on the diagnosis of long-QT syndrome in a non-fatal case of ExDS                                                                         |
| Bunai                            | Legal Med.                   | 2008 | ExDS                  | Non-clinical | 1        | N/a        | 1        | 1          | Case report of fatal hyperthermia in a case of ExDS with restraint                                                                                            |
| Burnett                          | Prehospital Emerg Care.      | 2012 | ExDS                  | Clinical     | 1        | N/a        | 1        | 0          | Clinical case report of laryngospasm after intramuscular ketamine administration in a non fatal case of ExDS                                                  |
| Byard                            | J Forensic Sci.              | 2016 | ExDS                  | Non-clinical | 1        | N/a        | 1        | 1          | Forensic case report of head trauma in a fatal drug-induced ExDS, without restraint                                                                           |
| Byard                            | Forensic Sci Med Pathol.     | 2017 | ExDS                  | Non-clinical | 1        | N/a        | 0        | 0          | Forensic pathologist commentary on the issues surrounding ExDS. No case described                                                                             |
| Corstens                         | J Forensic Legal Med.        | 2018 | ExDS                  | Clinical     | 1        | N/a        | 1        | 0          | Clinical Case report of non-fatal ExDS after GHB withdrawal                                                                                                   |
| Daugherty                        | Law Enf. Man. Inst. of Texas | 2012 | ExDS                  | Non-clinical | 2        | N/a        | 2        | 2          | Thesis from a police commander on acceptance and recognition of ExDS by law enforcement. Includes 1 fatal case of cocaine-induced ExDS                        |
| Debelmas                         | Radiology                    | 2018 | ExDS                  | Clinical     | 1        | N/a        | 1        | 0          | Clinical radiology case description of non-fatal drug-induced ExDS                                                                                            |
| Desharnais                       | Forensic Sci Med Pathol.     | 2017 | ExDS                  | Non-clinical | 1        | N/a        | 1        | 1          | Toxicological case report of fatal MDPV-induced ExDS                                                                                                          |
| Downes                           | Clin Toxicol.                | 2015 | AgDS                  | Clinical     | 1        | N/a        | 1        | 0          | Clinical case report of non-fatal phenibut-induced ExDS                                                                                                       |
| Dyer                             | Ann Emerg Med.               | 2001 | Neither               | Clinical     | 8        | N/a        | 8        | 1          | Clinical case series of 7 non-fatal and 1 fatal case of GHB withdrawal                                                                                        |
| Feeney                           | J Natl Med Assoc.            | 2010 | AgDS                  | Clinical     | 1        | N/a        | 1        | 1          | Clinical case report of a non-fatal Taser-induced agitated state                                                                                              |
| Fishbain                         | Ann Emerg Med.               | 1981 | Neither               | Clinical     | 1        | N/a        | 1        | 1          | Clinical case report on the medical management (misdiagnosis) of fatal cocaine-induced delirium                                                               |
| Ho                               | Prehospital Emerg Care.      | 2012 | ExDS                  | Clinical     | 2        | N/a        | 2        | 1          | Clinical case series of two non-fatal ExDS, successfully treated with pre-hospital ketamine                                                                   |
| Imam                             | J Emerg Med.                 | 2013 | Neither               | Clinical     | 6        | N/a        | 6        | 1          | Clinical case series on the clinical aspects and management of 1 fatal case and 5 non-fatal instances of bath salt toxicity (not diagnosed with ExDS or AgDS) |
| Jovel                            | J Forensic Sci.              | 2014 | ExDS                  | Non-clinical | 1        | N/a        | 1        | 0          | Toxicological case report of non-fatal tryptamine 5-eO-DALT-induced ExDS                                                                                      |
| Kasick                           | Am J Drug Alcohol Abuse.     | 2012 | Neither               | Clinical     | 2        | N/a        | 2        | 0          | Clinical case series of two non-fatal cases of "bath salt" toxicity                                                                                           |
| Kennedy                          | J Correct Heal Care.         | 2017 | ExDS                  | Clinical     | 1        | N/a        | 1        | 1          | Clinical case report of delayed death after ExDS                                                                                                              |
| Kesha                            | J Forensic Sci.              | 2013 | ExDS                  | Non-clinical | 1        | N/a        | 1        | 1          | Toxicological case report of fatal MDPV-induced ExDS                                                                                                          |
| Kiely                            | J Anal Toxicol.              | 2009 | ExDS                  | Non-clinical | 1        | N/a        | 1        | 1          | Toxicological case report of fatal methamphetamine-induced ExDS                                                                                               |
| Kodikara                         | Legal Med.                   | 2012 | ExDS                  | Non-clinical | 2        | N/a        | 0        | 0          | Forensic pathology case series of two cases which were initially thought to be fatal ExDS, but pulmonary embolism and cardiac tamponade at autopsy            |
| Kowalski                         | Pediatr Emerg Care.          | 2017 | AgDS                  | Clinical     | 5        | N/a        | 5        | 0          | Clinical case series on ketamine treatment in 5 cases of non-fatal AgDS                                                                                       |
| Kristofic                        | J Anal Toxicol.              | 2016 | ExDS                  | Non-clinical | 1        | N/a        | 1        | 1          | Toxicological case report of fatal 25C-NBOMe-induced ExDS                                                                                                     |
| Kunz                             | Forensic Sci Int             | 2018 | ExDS                  | Non-clinical | 1        | N/a        | 1        | 1          | Forensic pathology case report on death during restraint in man with ExDS (deemed manslaughter)                                                               |
| Labay                            | Forensic Sci Int.            | 2016 | ExDS                  | Non-clinical | 2        | N/a        | 2        | 2          | Retrospective analysis of 25 deaths due to synthetic cannabinoids, including two deemed ExDS                                                                  |
| Lucena                           | Eur Heart J.                 | 2010 | ExDS                  | Clinical     | 3        | N/a        | 3        | 3          | Prospective analysis of cocaine-induced sudden death, includes 3 fatal ExDS cases.                                                                            |
| Lusthof                          | Forensic Sci Int.            | 2011 | ExDS                  | Non-clinical | 1        | N/a        | 1        | 1          | Toxicological case report of fatal mephedrone-induced ExDS                                                                                                    |
| Maher                            | Can J Emerg Med.             | 2014 | ExDS                  | Clinical     | 1        | N/a        | 1        | 0          | Clinical case report of a successful (non-fatal) resuscitation in ExDS                                                                                        |
| Mash                             | J Chem Neuroanat.            | 2000 | ExDS                  | Non-clinical | 8        | N/a        | 8        | 8          | Neuropathological study on the effects of cocaine in ExDS vs. non-ExDS cases                                                                                  |
| McDaniel                         | J Psychoactive Drugs         | 2001 | Neither               | Clinical     | 2        | N/a        | 3        | 0          | Clinical case series discussing the clinical features of five non-fatal cases of GHB withdrawal                                                               |
| Menaker                          | J Emerg Med.                 | 2011 | AgDS                  | Clinical     | 1        | N/a        | 1        | 0          | Clinical case report of non-fatal cocaine-induced AgDS with hyperthermia                                                                                      |
| Miller                           | Restraint Asphyxia Newz Dir. | 1998 | ExDS                  | Clinical     | 1        | N/a        | 1        | 0          | Clinical case report of a non-fatal case of ExDS with restraint.                                                                                              |
| Mirchandani                      | Am J Forensic Med Pathol.    | 1994 | AgDS                  | Non-clinical | 4        | N/a        | 4        | 4          | Forensic pathology case series of 4 cases of sudden death after cocaine-induced AgDS with restraint                                                           |
| Morrison                         | Med Sci Law.                 | 2001 | ExDS                  | Non-clinical | 1        | N/a        | 1        | 1          | Forensic pathology case report of a fatal psychotic ExDS with restraint                                                                                       |
| Murray                           | J Med Toxicol.               | 2012 | ExDS                  | Non-clinical | 1        | N/a        | 1        | 1          | Toxicological case report of fatal MDPV-induced ExDS.                                                                                                         |
| O'Halloran                       | Am J Forensic Med Pathol.    | 1993 | ExDS                  | Non-clinical | 11       | N/a        | 11       | 11         | Forensic pathology case series of 11 fatal ExDS cases with restraint                                                                                          |
| O'Halloran                       | Am J Forensic Med Pathol.    | 2000 | Both                  | Non-clinical | 20       | N/a        | 18       | 18         | Forensic pathology case series on death during prone restraint, 18 cases deemed to have ExDS or AgDS, 5 times included in cause of death                      |
| Park                             | Prehospital Emerg Care.      | 2001 | AgDS                  | Clinical     | 2        | N/a        | 2        | 2          | Clinical case series describing two fatal AgDS cases on an emergency department                                                                               |
| Penders                          | Am J Drug Alcohol Abuse.     | 2012 | ExDS                  | Non-clinical | 3        | N/a        | 0        | 0          | Toxicological discussion of MDPV-induced delirium                                                                                                             |
| Pestaner                         | Am J Forensic Med Pathol.    | 2003 | Neither               | Non-clinical | 2        | N/a        | 2        | 2          | Toxicological case series on deaths during the arrest of two cases of phencyclidine-induced delirium                                                          |
| Plush                            | J Intensive Care Med.        | 2015 | AgDS                  | Clinical     | 1        | N/a        | 1        | 0          | Clinical case report describing the clinical management of a non-fatal cocaine-induced delirium                                                               |
| Pritchard                        | Air Med J.                   | 2014 | Neither               | Clinical     | 1        | N/a        | 1        | 0          | Clinical case report on the use of ketamine to treat a non-fatal case of drug-induced psychosis                                                               |
| Rayamane                         | J Indian Soc of Toxicology   | 2015 | ExDS                  | Non-clinical | 2        | N/a        | 2        | 2          | Toxicological case series of two cases of acute death during alcohol withdrawal, deemed to be ExDS                                                            |
| Reichmuth                        | BMJ Case Rep.                | 2015 | Neither               | Clinical     | 1        | N/a        | 1        | 1          | Clinical case report of non-fatal delirium due to baclofen overdose                                                                                           |
| Ruttenber                        | Am J Forensic Med Pathol.    | 1999 | ExDS                  | Clinical     | 1        | N/a        | 1        | 1          | Retrospective case-control study between fatal ExDS and fatal cocaine-induced rhabdomyolysis, introduced by 1 fatal case, not classified as ExDS or AgDS      |
| Samuel                           | Neuropsychiatr Dis Treat.    | 2009 | Both (ExDS preferred) | Clinical     | 1        | N/a        | 2        | 1          | Clinical case series and review on ExDS                                                                                                                       |
| Scaggel                          | Prehosp Disaster Med.        | 2016 | ExDS                  | Clinical     | 7        | N/a        | 7        | 0          | Retrospective clinical case series of 7 effective ketamine treatments in pre-hospital setting for (non-fatal) ExDS                                            |
| Schiavone                        | Toxicol Lett.                | 2016 | ExDS                  | Non-clinical | 1        | N/a        | 0        | 0          | Literature review on contribution of brain NADPH oxidase derived oxidative stress in the development of cocaine-induced ExDS                                  |
| Shields                          | J Forensic Sci.              | 2015 | ExDS                  | Non-clinical | 1        | N/a        | 1        | 1          | Forensic pathology case report of sudden death due to cocaine-induced ExDS                                                                                    |
| Śliwicka                         | J Forensic Leg Med.          | 2019 | ExDS                  | Non-clinical | 3        | N/a        | 3        | 3          | Forensic pathology case series of three fatal cases of ExDS                                                                                                   |
| Storey                           | St Louis Univ Law J.         | 2012 | ExDS                  | Non-clinical | 1        | N/a        | 1        | 1          | Legal thesis on ExDS, introduced by a case report of fatal cocaine-induced ExDS                                                                               |
| Stratton                         | Ann Emerg Med.               | 1995 | ExDS                  | Clinical     | 2        | N/a        | 2        | 2          | Clinical case series of two deaths during restraint for drug-induced ExDS                                                                                     |
| Stratton                         | Am J Emerg Med.              | 2001 | ExDS                  | Clinical     | 18       | N/a        | 216      | 18         | Clinical case-control study of differences between fatal vs. non-fatal cases of restraint for ExDS                                                            |
| Sztajnkrzyer                     | Emerg Med Serv.              | 2005 | Both (ExDS preferred) | Clinical     | 1        | N/a        | 1        | 1          | Clinical literature review of cocaine-induced ExDS, introduced by case report of 1 fatal case                                                                 |
| Wetli                            | J Forensic Sci.              | 1985 | ExDS                  | Non-clinical | 7        | N/a        | 7        | 7          | Forensic pathology case series 7 cases of fatal cocaine-induced ExDS                                                                                          |
| Wiebe                            | Paediatr Child Heal.         | 2008 | Neither               | Non-clinical | 4        | N/a        | 4        | 4          | Toxicological case series of 4 children with non-fatal "Angel's trumpet" poisoning. Does not use term Excited Delirium                                        |

| REFERENCES FOR THE GROUP ANALYSIS |                           |      |           |              | Strømmer | Strømmer   | Reviewed | Reviewed   |                                                                                                                                                                                        |
|-----------------------------------|---------------------------|------|-----------|--------------|----------|------------|----------|------------|----------------------------------------------------------------------------------------------------------------------------------------------------------------------------------------|
| First author                      | Publishing journal        | Year | Term used | Context      | N        | Fatalities | N        | Fatalities | Paper summary                                                                                                                                                                          |
| Baldwin                           | J Forensic Legal Med.     | 2016 | ExDS      | Non-clinical | 73       | 73         | 73       | 2          | Analysis of 5962 instances of use of force by police to identify features of ExDS. 71 non-fatal and 2 fatal cases with more than 6 features of ExDS                                    |
| Cole                              | Am J Emerg Med.           | 2018 | ExDS      | Clinical     | 49       | 0          | 9        | 0          | Clinical study of the effectiveness of ketamine as treatment for prehospital agitation. 49 cases with 'profound agitation'. Only one fatal case with an unrelated cause of death       |
| Ezaki                             | Am J Drug Alcohol Abuse.  | 2016 | ExDS      | Non-clinical | 2        | 2          | 2        | 2          | Toxicological case series on 61 cases of fatal synthetic cannabinoid overdose, with two as ExDS as cause of death                                                                      |
| Grant                             | Am J Forensic Med Pathol. | 2009 | ExDS      | Non-clinical | 21       | 21         | 21       | 21         | Review of 62 deaths in police custody with features of ExDS, but only 21 with fatal ExDS                                                                                               |
| Gray                              | Med J Aust.               | 2007 | AgDS      | Clinical     | 31       | 0          | 31       | 0          | Study on clinical characteristics of amphetamine-related presentations to emergency departments: 156 non-fatal cases of which 31 cases with 'sympathomimetic agitated delirium'        |
| Hall                              | J Forensic Legal Med.     | 2015 | ExDS      | Non-clinical | 86       | 1          | 86       | 1          | Study on the prevalence of ExDS in 4828 'use of force' police encounters of which 86 individuals (1 fatal) had 6 or more features of ExDS                                              |
| Ho                                | West J Emerg Med.         | 2009 | ExDS      | Non-clinical | 102      | 102        | 102      | 102        | Study on arrest-related deaths. 162 cases, of which 102 displayed 'erratic behaviour', based on media sources (no medical diagnoses)                                                   |
| Li                                | J Emerg Med.              | 2019 | ExDS      | Clinical     | 31       | 0          | 31       | 0          | Clinical study to evaluate ketamine as a treatment for ExDS. 31 non-fatal cases                                                                                                        |
| Mash                              | Forensic Sci Int.         | 2009 | ExDS      | Non-clinical | 90       | 90         | 90       | 90         | Retrospective analysis of biomarkers in autopsy brains of 90 fatal ExDS cases, compared to 30 control brains                                                                           |
| Michaud                           | J Forensic Legal Med.     | 2016 | ExDS      | Non-clinical | 35       | 35         | 35       | 35         | Retrospective analysis of restraint related deaths with (n=35) and without (n=6) ExDS                                                                                                  |
| Miner                             | Ann Emerg Med.            | 2018 | Neither   | Clinical     | 68       | 0          | 260      | 7          | Prospective study on characteristics and prevalence of agitated patients in emergency departments: 43 838 patient included, of which 1 146 agitated, and 260 met criteria for delirium |
| Mo                                | West J Emerg Med.         | 2020 | ExDS      | Clinical     | 37       | 0          | 37       | 0          | Retrospective analysis of ketamine treatment for 'severe agitation/excited delirium' in emergency departments                                                                          |
| Pollanen                          | Can Med Ass J             | 1998 | ExDS      | Non-clinical | 21       | 21         | 21       | 21         | Analysis of 21 cases of fatal ExDS                                                                                                                                                     |
| Ross                              | Modern Pathol.            | 1998 | ExDS      | Non-clinical | 61       | 61         | 61       | 61         | Analysis of 61 cases of fatal ExDS in police custody                                                                                                                                   |
| Ruttenber                         | J Forensic Sci.           | 1997 | ExDS      | Non-clinical | 58       | 58         | 58       | 58         | Toxicological case-control study of 58 fatal cocaine-induced ExDS vs 125 fatal cocaine overdose without ExDS                                                                           |
| Southall                          | J Forensic Legal Med.     | 2008 | Both      | Non-clinical | 24       | 24         | 24       | 24         | Analysis of 45 cases of death in police custody, with 19 fatal ExDS and 5 fatal AgDS                                                                                                   |
| Strote                            | Prehospital Emerg Care.   | 2006 | ExDS      | Non-clinical | 3        | 3          | 28       | 3          | Analysis of 37 Taser-related deaths, 28 with ExDS, of which 3 as cause of death                                                                                                        |
| Strote                            | Am J Emerg Med.           | 2014 | ExDS      | Clinical     | 43       | 43         | 43       | 0          | Clinical analysis of prevalence of medical diagnoses and restraint in 43 individuals with non-fatal ExDS                                                                               |
| Vilke                             | J Forensic Legal Med.     | 2019 | ExDS      | Clinical     | 21       | 0          | 21       | 0          | Prospective study on biomarkers in ExDS, comparing 30 controls, 25 agitated and 21 ExDS patients                                                                                       |
